# Supplementary material
Source: PubMed Central journal article supplement (PMC3298035)
Supplement: NIHMS353421-supplement-Supplemental_Table_1.pdf [file NIHMS353421-supplement-Supplemental_Table_1.pdf]

**Supplemental Table 1**

| <b>Gene</b>                                                | <b>Fold Decrease by DTx</b> | <b>Function</b>                                                                                                                                                                                                                                                                                                     |
|------------------------------------------------------------|-----------------------------|---------------------------------------------------------------------------------------------------------------------------------------------------------------------------------------------------------------------------------------------------------------------------------------------------------------------|
| <b>Oas1a (2'-5' oligoadenylate synthetase 1A)</b>          | <b>3.2</b>                  | an endogenous antiviral pathway that upon stimulation with IFN, leads to decrease in viral replication via regulation of IFN-stimulated gene expression and subsequent induction of viral mRNA degradation, inhibition of viral protein synthesis, and activation of apoptosis in virally infected cells            |
| <b>Aif1 (Allograft inflammatory factor 1)</b>              | <b>2.2</b>                  | AIF-1 is selectively expressed in macrophages and neutrophils; upregulated by IFN- $\gamma$ and reduced when T cell activation is inhibited                                                                                                                                                                         |
| <b>Cathepsin S</b>                                         | <b>3.2</b>                  | cysteine protease with potent endoproteolytic activity and a broad pH profile. Cathepsin S activity is essential for complete processing of the MHC class II-associated invariant chain within B cells and dendritic cells; upregulated by IFN gamma through IRF-1 (in human keratinocytes and in epithelial cells) |
| <b>Complement C1q alpha</b>                                | <b>2.8</b>                  | C1q mediates activation of the classical pathway; Is modulated by IFN gamma, IL-1, and IL-6 in resident and stimulated peritoneal macrophages and in human monocyte derived macrophages                                                                                                                             |
| <b>Complement C1q beta</b>                                 | <b>2.6</b>                  |                                                                                                                                                                                                                                                                                                                     |
| <b>Complement 1, q subcomponent, C chain</b>               | <b>2.5</b>                  |                                                                                                                                                                                                                                                                                                                     |
| <b>Complement 1, s subcomponent</b>                        | <b>2.7</b>                  |                                                                                                                                                                                                                                                                                                                     |
| <b>Complement 3a receptor 1</b>                            | <b>2.0</b>                  | Involved in proinflammatory and proapoptotic responses; message and protein expression induced in human retinal epithelial pigment cells by IFN gamma                                                                                                                                                               |
| <b>CCR2</b>                                                | <b>2.2</b>                  | Binds MCP-1, MCP-2, MCP-3, and CCL12, shown to be important in monocyte and DC recruitment; monocyte recruitment to the brain is dependent on IFN gamma in a Listeria model                                                                                                                                         |
| <b>CD40</b>                                                | <b>1.7</b>                  | Expressed by DC, B cells, Macrophages; induced by IFN gamma                                                                                                                                                                                                                                                         |
| <b>CD74 (invariant chain)</b>                              | <b>3.0</b>                  | Early molecule required for antigen presentation; induced by IFN gamma in hepatic stellate cells; novel IFN gamma inducible murine CD74 isoform was recently discovered                                                                                                                                             |
| <b>Epithelial stromal interaction 1 (breast)</b>           | <b>3.0</b>                  | Interferon response gene, protein involved in regulation of tumor cell properties and epithelial-mesenchymal transition                                                                                                                                                                                             |
| <b>Fas receptor</b>                                        | <b>2.1</b>                  | Belongs to the tumor necrosis factor receptor family, upon engagement by specific antibodies or FasL, transduces a signal for apoptosis in permissive cells; induced by IFN gamma in cultured murine renal cells and in the kidney during endotoxemia                                                               |
| <b>Fc receptor IgG, high affinity (Fc gamma RI) (CD64)</b> | <b>2.3</b>                  | Expressed on macrophages, dendritic cells, neutrophils, and eosinophils, Expression induced by IFN gamma in neutrophils and monocytes                                                                                                                                                                               |
| <b>Granzyme A</b>                                          | <b>1.9</b>                  | Also called granzyme 1, one of the serine proteases located in the granules of NK cells and cytotoxic T cells                                                                                                                                                                                                       |
| <b>Granzyme B</b>                                          | <b>1.9</b>                  | Also called granzyme 2, one of the serine proteases in NK cell and CD8 T cell granules; expression crossregulated by IFN gamma and IL-10                                                                                                                                                                            |
| <b>MHC II A alpha</b>                                      | <b>2.8</b>                  | Expressed on dendritic cells, macrophages, and B cells; peptides presented onto class II molecules are derived from extracellular proteins; expression in antigen presenting cells induced by IFN gamma                                                                                                             |
| <b>MHC II A beta</b>                                       | <b>2.4</b>                  |                                                                                                                                                                                                                                                                                                                     |
| <b>MHC II locus Mb1/Mb2</b>                                | <b>1.8</b>                  |                                                                                                                                                                                                                                                                                                                     |
| <b>MHC II E alpha</b>                                      | <b>2.4</b>                  |                                                                                                                                                                                                                                                                                                                     |
| <b>MHC II E beta</b>                                       | <b>2.6</b>                  |                                                                                                                                                                                                                                                                                                                     |

|                                                                                       |            |                                                                                                                                                                                                                                                                                                                                                                                                                                                                                                                                                                                                                                                                                                                            |
|---------------------------------------------------------------------------------------|------------|----------------------------------------------------------------------------------------------------------------------------------------------------------------------------------------------------------------------------------------------------------------------------------------------------------------------------------------------------------------------------------------------------------------------------------------------------------------------------------------------------------------------------------------------------------------------------------------------------------------------------------------------------------------------------------------------------------------------------|
| <b>H-2k region</b>                                                                    | <b>3.3</b> | One of the regions in the murine MHC, alleles of which determine serologically defined antigens;<br>expression induced by IFN gamma                                                                                                                                                                                                                                                                                                                                                                                                                                                                                                                                                                                        |
| <b>MRNA H2-D region locus</b>                                                         | <b>2.3</b> | One of the regions in the murine MHC; H-2d locus determines a series of serologically defined antigens;<br>expression induced by IFN gamma                                                                                                                                                                                                                                                                                                                                                                                                                                                                                                                                                                                 |
| <b>Interferon activated gene 205 /// myeloid cell nuclear differentiation antigen</b> | <b>2.9</b> | Expressed in monocytes, macrophages, and B cell lines; involved in the granulocyte/monocyte cell specific response to IFN gamma                                                                                                                                                                                                                                                                                                                                                                                                                                                                                                                                                                                            |
| <b>Interferon gamma inducible protein 47</b>                                          | <b>3.2</b> | IFN-inducible protein GTPases expressed in B cells and macrophages that have been shown to regulate host resistance to intracellular pathogens                                                                                                                                                                                                                                                                                                                                                                                                                                                                                                                                                                             |
| <b>Interferon induced transmembrane protein 6</b>                                     | <b>2.0</b> | encode cell surface proteins that modulate cell-cell adhesion and cell differentiation                                                                                                                                                                                                                                                                                                                                                                                                                                                                                                                                                                                                                                     |
| <b>Interferon gamma induced GTPase</b>                                                | <b>3.2</b> | Interferon inducible Golgi membrane associated GTPase of the mouse whose disruption causes susceptibility to different pathogens                                                                                                                                                                                                                                                                                                                                                                                                                                                                                                                                                                                           |
| <b>Interferon inducible GTPase 1</b>                                                  | <b>3.0</b> | Member of the interferon inducible p47 GTPases, mediates cell autonomous resistance against several intracellular pathogens                                                                                                                                                                                                                                                                                                                                                                                                                                                                                                                                                                                                |
| <b>Interleukin 13 receptor, alpha 2</b>                                               | <b>1.8</b> | High affinity IL-13 receptor;<br>In vivo prevention of IL-13Ralpha(2) expression reduces production of TGF-beta in oxazolone-induced colitis; IL-13 signaling through the IL-13a2 receptor is involved in the induction of TGFbeta1 production and fibrosis;<br>After IFN gamma treatment, intracellular IL13a2 receptor is rapidly mobilized from vesicles and its surface expression is upregulated and IL-13 signaling is diminished                                                                                                                                                                                                                                                                                    |
| <b>Interleukin 18 binding protein</b>                                                 | <b>2.2</b> | Soluble antagonist of IL-18 and belongs to the immunoglobulin-like class of receptors; has limited amino acid sequences with those of the IL1 receptor type II;<br>suppresses IFNgamma by binding IL-18, thus reducing Th1 responses;<br>upregulated by IFN gamma in resident microglial cells in the CNS during multiple sclerosis-like disease in mice; overexpression in the CNS reduces Th17 responses limits disease severity                                                                                                                                                                                                                                                                                         |
| <b>Interleukin 1 beta</b>                                                             | <b>2.1</b> | Protein encoded is a member of the interleukin 1 cytokine family; cytokine is produced by activated macrophages as a proprotein, which is proteolytically processed to its active form by caspase 1;<br>an important mediator of the inflammatory response, and is involved in a variety of cellular activities, including cell proliferation, differentiation, and apoptosis;<br>IFN $\gamma$ potentiates IL-1 $\beta$ release from human cells, but transiently inhibits the production of IL-1 $\beta$ from mouse cells                                                                                                                                                                                                 |
| <b>Interleukin 1 receptor antagonist</b>                                              | <b>2.1</b> | Member of the IL-1 family that binds to IL-1 receptors but does not induce any intracellular response;<br>One isoform is secreted from monocytes, macrophages, neutrophils, and other cells (sIL-1Ra) and another isoform remains in the cytoplasm of keratinocytes and other epithelial cells, monocytes, and fibroblasts; an additional 16-kDa intracellular isoform of IL-1Ra has recently been described in neutrophils, monocytes, and hepatic cells;<br>IL-1Ra is important in host defense against endotoxin-induced injury;<br>IFN-gamma inhibits IL-1ra production by human monocytes, but up-regulates its production in human alveolar macrophages at the protein and mRNA levels, also in carcinoma cell lines |

|                                                                       |            |                                                                                                                                                                                                                                                                                                                                                                                                                                                                                                         |
|-----------------------------------------------------------------------|------------|---------------------------------------------------------------------------------------------------------------------------------------------------------------------------------------------------------------------------------------------------------------------------------------------------------------------------------------------------------------------------------------------------------------------------------------------------------------------------------------------------------|
| <b>Interleukin 20 receptor, alpha</b>                                 | <b>1.8</b> | Together with IL-20 receptor, beta, forms a heterodimer that is a receptor for IL-20; Highly expressed in skin, and is upregulated in psoriasis; IL-20: IL-10 family protein, produced by keratinocytes and monocytes, and maturing DCs; transmits through receptor complexes, regulates proliferation and differentiation of keratinocytes and epithelial cells during inflammation; IFN gamma inhibits IL20R1 expression;                                                                             |
| <b>Interleukin 2 receptor, gamma chain</b>                            | <b>2.0</b> | protein encoded by this gene is an important signaling component of many interleukin receptors, including those of interleukin -2, -4, -7 and -21, and is thus referred to as the common gamma chain; mutations in this gene cause X-linked severe combined immunodeficiency (XSCID), as well as X-linked combined immunodeficiency (XCID); Stimulation with IFN gamma induces a major increase of IL-2R gamma mRNA in monocytes in a time- and a dose-dependent manner, also increases mRNA stability, |
| <b>Interferon regulatory factor 8</b>                                 | <b>1.9</b> | member of the IRF family of transcription factors important in interferon- $\gamma$ -mediated signaling and in the development and function of dendritic cells; required for Ig light but not heavy-chain gene rearrangement can activate RANTES transcription in macrophages                                                                                                                                                                                                                           |
| <b>Interferon-stimulated protein (Isq20)</b>                          | <b>2.4</b> | One of many proteins regulated by IFN gamma whose protein product is an effector of the antiviral state; ISG20 overexpression potently inhibits Sindbis virus replication in vitro; also inhibits viral protein and RNA biosynthesis in vitro in infected West Nile virus and Dengue virus cultures                                                                                                                                                                                                     |
| <b>Similar to Ly-6C<br/>///lymphocyte antigen 6 complex, locus C1</b> | <b>3.4</b> | Ly-6c:<br>Expressed on neutrophils, monocytes, immature B cell populations; Is also a hemopoietic cell differentiation Ag found on a subset of CD8 T cells in the periphery;<br>Inducible by IFN gamma, alpha, and beta                                                                                                                                                                                                                                                                                 |
| <b>Leukocyte specific transcript 1</b>                                | <b>2.2</b> | specific function of LST1 is not known, although expression analysis and functional data suggest an immunomodulatory role; up-regulated in response to lipopolysaccharide, IFN gamma and bacterial infection                                                                                                                                                                                                                                                                                            |
| <b>Selectin, lymphocyte (CD62L)</b>                                   | <b>1.8</b> | a cell surface adhesion molecule that belongs to a family of adhesion/homing receptors; protein is required for binding and subsequent rolling of leucocytes on endothelial cells, facilitating their migration into secondary lymphoid organs and inflammation sites;Induced by IFN gamma                                                                                                                                                                                                              |
